# Supplementary material
Source: bioRxiv or medRxiv preprint supplement (https://www.biorxiv.org/highwire/filestream/42818/field_highwire_adjunct_files/0/144600-1.pdf)
Supplement: Supplementary file [file 144600-1.pdf]

## **Supplementary Material**

### **Genome-enabled insights into the ecophysiology of the comammox bacterium**

#### ***Candidatus Nitrospira nitrosa***

Pamela Y. Camejo<sup>1</sup>, Jorge Santo Domingo<sup>2</sup>, Katherine D. McMahon<sup>1,3</sup>, Daniel R.

Noguera<sup>1,\*</sup>

<sup>1</sup>Department of Civil and Environmental Engineering, University of Wisconsin -  
Madison, Madison, WI, USA

<sup>2</sup> Environmental Protection Agency, Cincinnati, OH, USA

<sup>3</sup>Department of Bacteriology, University of Wisconsin - Madison, Madison, WI, USA

## Supplementary Tables

**Table S1.** Metrics of the two *Nitrospira* genomes assembled in this study after each genome refinement step.

| Bin Id    | Assembly Step                                         | GC (%) | Genome size (Mbp) | Gene count | # Scaffolds | N50    | Completeness (%) | Contamination (%) | Strain heterogeneity (%) |
|-----------|-------------------------------------------------------|--------|-------------------|------------|-------------|--------|------------------|-------------------|--------------------------|
| UW-LDO-01 | MMgenome                                              | 55.1   | 4.13              | 4479       | 523         | 17,227 | 95.9             | 3.79              | 0                        |
|           | Contigs length >1,000                                 | 55.0   | 4.08              | 4330       | 422         | 17,431 | 95.9             | 3.79              | 0                        |
|           | SSpace Scaffolding                                    | 55.0   | 4.09              | 4268       | 287         | 27,733 | 95.9             | 3.74              | 0                        |
|           | SSpace Gap Filling                                    | 55.0   | 4.08              | 4247       | 287         | 27,614 | 95.9             | 3.74              | 0                        |
|           | Removal of scaffolds with non- <i>Nitrospira</i> ORFs | 54.9   | 3.91              | 4031       | 230         | 29,398 | 95.9             | 3.64              | 0                        |
| UW-LDO-02 | MMgenome                                              | 59.3   | 4.17              | 5360       | 1,878       | 4,227  | 97.5             | 15.4              | 0                        |
|           | Contigs length >1,000                                 | 59.2   | 3.69              | 4262       | 1,003       | 4,891  | 94.3             | 6.10              | 0                        |
|           | SSpace Scaffolding                                    | 59.2   | 3.72              | 4082       | 584         | 10,904 | 94.3             | 4.66              | 0                        |
|           | SSpace Gap Filling                                    | 59.2   | 3.70              | 3993       | 584         | 10,895 | 94.4             | 4.66              | 0                        |
|           | Removal of scaffolds with non- <i>Nitrospira</i> ORFs | 59.2   | 3.54              | 3809       | 524         | 11,000 | 94.4             | 4.66              | 0                        |

Completeness, contamination and strain heterogeneity were assessed with CHECKM 0.7.1, according to the presence of 43 single-copy reference genes.

**Table S2.** Genomes included in the metagenomic mapping analysis and the number of reads mapping to each of them. The number of mapping reads was also normalized by the number of reads in each metagenome, paired-end reads average length and genome size.

|                  |                                                       |             | Metagenomic Sample |                   |                |                   |                |                   |               |                   |
|------------------|-------------------------------------------------------|-------------|--------------------|-------------------|----------------|-------------------|----------------|-------------------|---------------|-------------------|
|                  |                                                       |             | Day 100            |                   | Day 317        |                   | Day 522        |                   | Day 674       |                   |
|                  |                                                       |             | Reads Length       | 125               | Reads Length   | 125               | Reads Length   | 150               | Reads Length  | 125               |
|                  |                                                       |             | N° Reads           | 12,630,882        | N° Reads       | 16,037,438        | N° Reads       | 109,197,498       | N° Reads      | 16,056,492        |
| Functional Group | Genome                                                | Length (bp) | Mapping Reads      | Normalized Counts | Mapping Reads  | Normalized Counts | Mapping Reads  | Normalized Counts | Mapping Reads | Normalized Counts |
| AOA              | <i>Ca. Nitrosoarchaeum limnia</i> BG20 (AHJG01000000) | 1,855,559   | 4                  | 0                 | 8              | 0                 | 0              | 0                 | 0             | 0                 |
|                  | <i>Ca. Nitrosoarchaeum limnia</i> SFB1 (CM001158)     | 1,772,718   | 2                  | 0                 | 2              | 0                 | 0              | 0                 | 2             | 0                 |
|                  | <i>Nitrososphaera viennensis</i> EN76 (CP007536)      | 2,527,938   | 38                 | 0                 | 48             | 0                 | 0              | 0                 | 36            | 0                 |
|                  | <i>Cenarchaeum symbiosum</i> A (DP000238)             | 2,045,086   | 38                 | 0                 | 40             | 0                 | 0              | 0                 | 19            | 0                 |
|                  | <i>Nitrosopumilus maritimus</i> SCM1 (CP000866)       | 2,673,040   | 4                  | 0                 | 2              | 0                 | 0              | 0                 | 1             | 0                 |
|                  | <i>Nitrosopumilus</i> sp. AR (AJVJ01000001)           | 4,084,671   | -                  | -                 | 6              | 0                 | 0              | 0                 | 2             | 0                 |
| AOB              | <i>Nitrosococcus oceani</i> (NC_007484)               | 3,481,691   | 992                | 3                 | 2,032          | 5                 | 21,760         | 9                 | 964           | 2                 |
|                  | <i>Nitrosococcus mobilis</i> (FMWO00000000)           | 3,082,864   | 8,334              | 27                | 1,834          | 5                 | 4,690          | 2                 | 259           | 1                 |
|                  | <i>Nitrosomonas communis</i> Nm2 (NZ_CP011451)        | 4,067,838   | 686                | 2                 | 252            | 0                 | 982            | 0                 | 66            | 0                 |
|                  | <i>Nitrosomonas europaea</i> (AL954747)               | 2,812,094   | 2,702              | 10                | 3,138          | 9                 | 10,724         | 5                 | 586           | 2                 |
|                  | <i>Nitrosomonas eutropha</i> (NC_008344)              | 2,661,057   | 842                | 3                 | 316            | 1                 | 1,760          | 1                 | 96            | 0                 |
|                  | <i>Nitrosomonas</i> sp. AL212 (NC_015222)             | 3,180,526   | 910                | 3                 | 340            | 1                 | 6,868          | 3                 | 287           | 1                 |
|                  | <i>Nitrosomonas</i> sp. Is79A3 (CP002876)             | 3,783,444   | 2,678              | 7                 | 1,346          | 3                 | 10,166         | 4                 | 330           | 1                 |
|                  | <i>Nitrosomonas ureae</i> Nm10 (CP013341)             | 3,307,820   | 810                | 2                 | 214            | 1                 | 2,512          | 1                 | 99            | 0                 |
|                  | <i>Nitrosomonas aestuarii</i> (FOSP01000000)          | 3,994,034   | 594                | 1                 | 434            | 1                 | 1,144          | 0                 | 90            | 0                 |
|                  | <i>Nitrosomonas halophile</i> (FNOY01000000)          | 1,645,259   | 880                | 5                 | 610            | 3                 | 1,366          | 1                 | 167           | 1                 |
|                  | <i>Nitrosomonas nitrosa</i> (FOUF01000000)            | 3,154,865   | 400                | 1                 | 268            | 1                 | 808            | 0                 | 51            | 0                 |
|                  | <i>Nitrospira briensis</i> (NZ_CP012371)              | 3,441,569   | 630                | 2                 | 432            | 1                 | 984            | 0                 | 146           | 0                 |
|                  | <i>Nitrospira multiformis</i> (CP000103)              | 3,184,243   | 614                | 2                 | 408            | 1                 | 844            | 0                 | 111           | 0                 |
|                  | <i>Nitrospira</i> sp. NpAV (JXQM01000000)             | 3,210,113   | 1,096              | 3                 | 464            | 1                 | 1,108          | 0                 | 150           | 0                 |
| Comammox         | <i>Nitrospira</i> sp. UW-LDO-01                       | 3,909,139   | 545,070            | 1,380             | 244            | 0                 | 990            | 0                 | 105           | 0                 |
|                  | <i>Nitrospira</i> sp. Ga0074138 (LNDU01000000)        | 4,111,525   | 2,980              | 7                 | 302            | 1                 | 26             | 0                 | 71            | 0                 |
|                  | <i>Ca. Nitrospira nitrosa</i> (CZQA01000000)          | 4,422,398   | 41,490             | 93                | 188            | 0                 | 88             | 0                 | 48            | 0                 |
|                  | <i>Ca. Nitrospira nitrificans</i> (CZPZ01000000)      | 2,385,067   | 4,766              | 20                | 410            | 1                 | 86             | 0                 | 108           | 0                 |
|                  | <i>Ca. Nitrospira inopinata</i> (LN885086)            | 3,155,724   | 1,628              | 5                 | 360            | 1                 | 278            | 0                 | 125           | 0                 |
| NOB              | <i>Nitrospira moscoviensis</i> NSP_M-1 (NZ_CP011801)  | 4,589,485   | 1,852              | 4                 | 644            | 1                 | 82             | 0                 | 253           | 0                 |
|                  | <i>Nitrospira defluvii</i> (NC_014355)                | 4,317,083   | 395,170            | 906               | 113,576        | 205               | 8,268          | 3                 | 38,506        | 69                |
|                  | <i>Nitrospira</i> sp. UW-LDO-02                       | 3,541,761   | 771,620            | 2,157             | 101,916        | 224               | 4,562          | 2                 | 18,577        | 41                |
|                  | <i>Nitrobacter winogradskyi</i> (NC_007406)           | 3,402,093   | 902                | 3                 | 1,066          | 2                 | 9,950          | 4                 | 759           | 2                 |
|                  | <i>Nitrobacter hamburgensis</i> (NC_007964)           | 4,406,967   | 1,784              | 4                 | 1,744          | 3                 | 16,432         | 5                 | 1,018         | 2                 |
|                  | <i>Nitrospira</i> sp. OLB23 (JZQY00000000)            | 3,754,263   | 6,276              | 17                | 2,086          | 4                 | 2,218          | 1                 | 516           | 1                 |
| Anammox          | <i>Ca. Brocadia fulgida</i> (LAQJ01000000)            | 3,552,939   | 36                 | 0                 | 40             | 0                 | 78             | 0                 | 21            | 0                 |
|                  | <i>Ca. Brocadia caroliniensis</i> (AYTS01000000)      | 3,728,197   | 20                 | 0                 | 42             | 0                 | 6              | 0                 | 16            | 0                 |
|                  | <i>Ca. Kuenenia stuttgartiensis</i> (AMCF01000000)    | 3,810,257   | 154                | 0                 | 148            | 0                 | 46             | 0                 | 339           | 1                 |
|                  | <i>Ca. Brocadia sinica</i> (BAFN01000000)             | 4,077,002   | 28                 | 0                 | 32             | 0                 | 46             | 0                 | 15            | 0                 |
|                  | <i>Ca. Jettenia caeni</i> (BAFH01000000)              | 4,087,350   | 20                 | 0                 | 32             | 0                 | 22             | 0                 | 12            | 0                 |
| <b>Total</b>     |                                                       |             | <b>1,796,050</b>   | <b>4,667</b>      | <b>234,730</b> | <b>476</b>        | <b>108,696</b> | <b>43</b>         | <b>63,548</b> | <b>126</b>        |

**Table S3.** Inventory of genes involved in energy-driving processes from complete and draft genomes of *Nitrospira*. Grey and white rectangles represent presence and absence of each gene, respectively.

| Category                       | Gene                               | Function                                            | Comammox                        |                               |                                   |                                 |                                 | NOB                             |                                |                           |
|--------------------------------|------------------------------------|-----------------------------------------------------|---------------------------------|-------------------------------|-----------------------------------|---------------------------------|---------------------------------|---------------------------------|--------------------------------|---------------------------|
|                                |                                    |                                                     | <i>Nitrospira</i> sp. UW-LDO-01 | <i>Ca. Nitrospira nitrosa</i> | <i>Ca. Nitrospira nitrificans</i> | <i>Ca. Nitrospira inopinata</i> | <i>Nitrospira</i> sp. Ga0074138 | <i>Nitrospira</i> sp. UW-LDO-02 | <i>Nitrospira moscoviensis</i> | <i>Nitrospira defluvi</i> |
| <b>Ammonia Oxidation</b>       | <i>amoA</i>                        | Ammonia monooxygenase subunit alpha                 |                                 |                               |                                   |                                 |                                 |                                 |                                |                           |
|                                | <i>amoB</i>                        | Ammonia monooxygenase subunit beta                  |                                 |                               |                                   |                                 |                                 |                                 |                                |                           |
|                                | <i>amoC</i>                        | Ammonia monooxygenase subunit gamma                 |                                 |                               |                                   |                                 |                                 |                                 |                                |                           |
| <b>Hydroxylamine Oxidation</b> | <i>haoA</i>                        | Hydroxylamine oxidoreductase subunit alpha          |                                 |                               |                                   |                                 |                                 |                                 |                                |                           |
|                                | <i>haoB</i>                        | Hydroxylamine oxidoreductase subunit beta           |                                 |                               |                                   |                                 |                                 |                                 |                                |                           |
|                                | <i>cycA</i>                        | Cytochrome c protein c554                           |                                 |                               |                                   |                                 |                                 |                                 |                                |                           |
|                                | <i>cycB</i>                        | Cytochrome c protein, cM552                         |                                 |                               |                                   |                                 |                                 |                                 |                                |                           |
| <b>Nitrite Oxidation</b>       | <i>nxrA</i>                        | Nitrite oxidoreductase, alpha subunit               |                                 |                               |                                   |                                 |                                 |                                 |                                |                           |
|                                | <i>nxrB</i>                        | Nitrite oxidoreductase, beta subunit                |                                 |                               |                                   |                                 |                                 |                                 |                                |                           |
| <b>Nitrite Reduction</b>       | <i>nirK</i>                        | Copper- containing dissimilatory nitrite reductases |                                 |                               |                                   |                                 |                                 |                                 |                                |                           |
|                                | <i>nrfA</i>                        | cytochrome c nitrite reductase                      |                                 |                               |                                   |                                 |                                 |                                 |                                |                           |
| <b>Urea Hydrolysis</b>         | <i>urtA</i>                        | Urea ABC transporter                                |                                 |                               |                                   |                                 |                                 |                                 |                                |                           |
|                                | <i>urtB</i>                        | Urea ABC transporter                                |                                 |                               |                                   |                                 |                                 |                                 |                                |                           |
|                                | <i>urtC</i>                        | Urea ABC transporter                                |                                 |                               |                                   |                                 |                                 |                                 |                                |                           |
|                                | <i>urtD</i>                        | Urea ABC transporter                                |                                 |                               |                                   |                                 |                                 |                                 |                                |                           |
|                                | <i>urtE</i>                        | Urea ABC transporter                                |                                 |                               |                                   |                                 |                                 |                                 |                                |                           |
|                                | <i>ureA</i>                        | Urease subunit gamma                                |                                 |                               |                                   |                                 |                                 |                                 |                                |                           |
|                                | <i>ureB</i>                        | Urease subunit beta                                 |                                 |                               |                                   |                                 |                                 |                                 |                                |                           |
|                                | <i>ureC</i>                        | Urease subunit alpha                                |                                 |                               |                                   |                                 |                                 |                                 |                                |                           |
|                                | <i>ureD</i>                        | Urease accessory protein                            |                                 |                               |                                   |                                 |                                 |                                 |                                |                           |
|                                | <i>ureF</i>                        | Urease accessory protein                            |                                 |                               |                                   |                                 |                                 |                                 |                                |                           |
| <i>ureG</i>                    | Urease accessory protein           |                                                     |                                 |                               |                                   |                                 |                                 |                                 |                                |                           |
| <b>Cyanase degradation</b>     | <i>cynS</i>                        | Cyanase hydratase                                   |                                 |                               |                                   |                                 |                                 |                                 |                                |                           |
| <b>Formate Oxidation</b>       | <i>fdsA</i>                        | Formate dehydrogenase subunit alpha                 |                                 |                               |                                   |                                 |                                 |                                 |                                |                           |
|                                | <i>fdsB</i>                        | Formate dehydrogenase subunit beta                  |                                 |                               |                                   |                                 |                                 |                                 |                                |                           |
|                                | <i>fdsC</i>                        | Formate dehydrogenase subunit gamma                 |                                 |                               |                                   |                                 |                                 |                                 |                                |                           |
|                                | <i>focA</i>                        | Formate transporter                                 |                                 |                               |                                   |                                 |                                 |                                 |                                |                           |
| <b>Hydrogen Oxidation</b>      | <i>hoxA</i>                        | Hydrogenase transcriptional regulatory protein      |                                 |                               |                                   |                                 |                                 |                                 |                                |                           |
|                                | <i>hupS</i>                        | Putative [NiFe] hydrogenase small subunit           |                                 |                               |                                   |                                 |                                 |                                 |                                |                           |
|                                | <i>hupL</i>                        | Putative [NiFe] hydrogenase large subunit           |                                 |                               |                                   |                                 |                                 |                                 |                                |                           |
|                                | <i>hypA</i>                        | Hydrogenase nickel incorporation protein            |                                 |                               |                                   |                                 |                                 |                                 |                                |                           |
|                                | <i>hypB</i>                        | Hydrogenase nickel incorporation protein            |                                 |                               |                                   |                                 |                                 |                                 |                                |                           |
|                                | <i>hypC</i>                        | Hydrogenase expression/formation protein            |                                 |                               |                                   |                                 |                                 |                                 |                                |                           |
|                                | <i>hypD</i>                        | Hydrogenase expression/formation protein            |                                 |                               |                                   |                                 |                                 |                                 |                                |                           |
|                                | <i>hypE</i>                        | Hydrogenase maturation protein                      |                                 |                               |                                   |                                 |                                 |                                 |                                |                           |
|                                | <i>hypF</i>                        | Hydrogenase metallocenter assembly protein          |                                 |                               |                                   |                                 |                                 |                                 |                                |                           |
|                                | <i>hyfB</i>                        | Hydrogenase, membrane subunit HyfB                  |                                 |                               |                                   |                                 |                                 |                                 |                                |                           |
|                                | <i>hyfC</i>                        | Hydrogenase, membrane subunit HyfC                  |                                 |                               |                                   |                                 |                                 |                                 |                                |                           |
|                                | <i>hyfE</i>                        | Hydrogenase, membrane subunit HyfE                  |                                 |                               |                                   |                                 |                                 |                                 |                                |                           |
| <i>hyfF</i>                    | Hydrogenase, membrane subunit HyfF |                                                     |                                 |                               |                                   |                                 |                                 |                                 |                                |                           |
| <i>hyfG</i>                    | Hydrogenase, large subunit HyfG    |                                                     |                                 |                               |                                   |                                 |                                 |                                 |                                |                           |
| <i>hyfI</i>                    | Hydrogenase, small subunit HyfI    |                                                     |                                 |                               |                                   |                                 |                                 |                                 |                                |                           |
| <b>Sulfur reduction</b>        | <i>hydA</i>                        | Sulfhydrogenase, subunit alpha                      |                                 |                               |                                   |                                 |                                 |                                 |                                |                           |
|                                | <i>hydB</i>                        | Sulfhydrogenase, subunit beta                       |                                 |                               |                                   |                                 |                                 |                                 |                                |                           |
|                                | <i>hydD</i>                        | Sulfhydrogenase, subunit delta                      |                                 |                               |                                   |                                 |                                 |                                 |                                |                           |
|                                | <i>hydG</i>                        | Sulfhydrogenase, subunit gamma                      |                                 |                               |                                   |                                 |                                 |                                 |                                |                           |
|                                | <i>hybD</i>                        | Hydrogenase maturation pretease                     |                                 |                               |                                   |                                 |                                 |                                 |                                |                           |

## Supplementary Figures

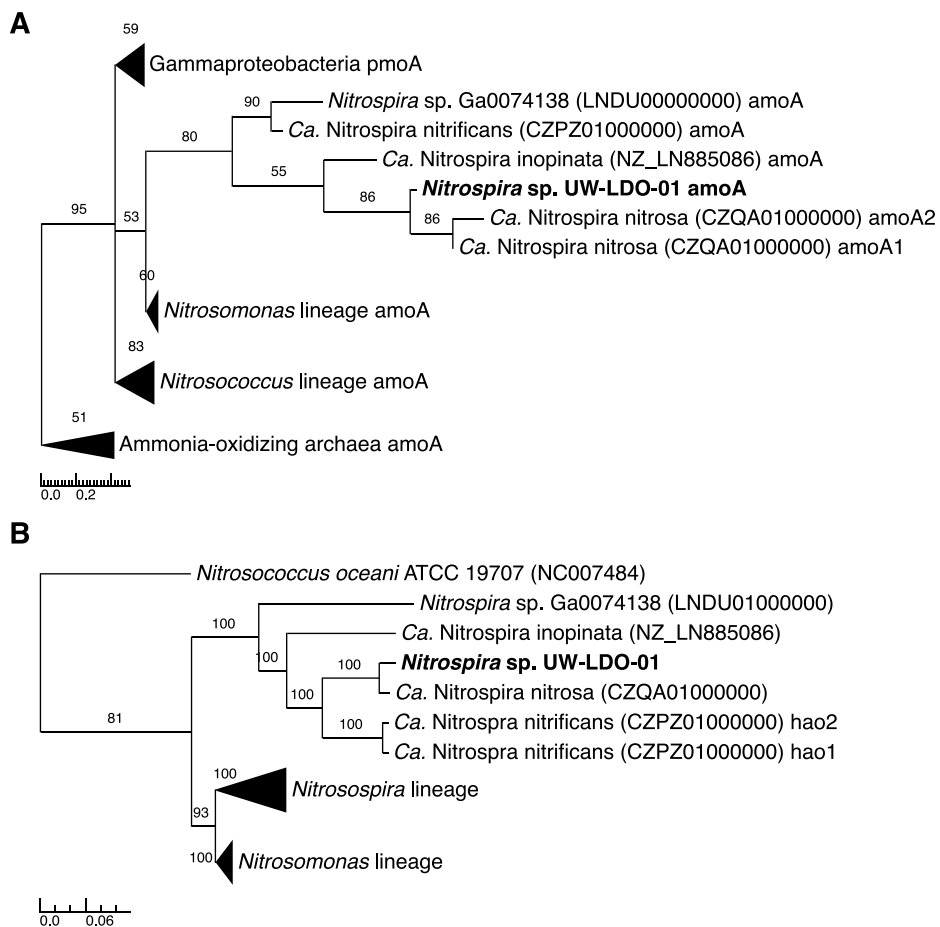

**Figure S1.** Neighbor-joining phylogenetic tree based on nucleic acid sequences of homologs to (A) *amoA* found in the genome of ammonia oxidizing microorganisms, methane oxidizing bacteria and comammox and (B) *hao* found in the genome of ammonia oxidizing bacteria and comammox. Bootstrap values are shown in the tree branches based on 1000 bootstrap replicates. The scale bar represents the number of nucleotide substitutions per site.

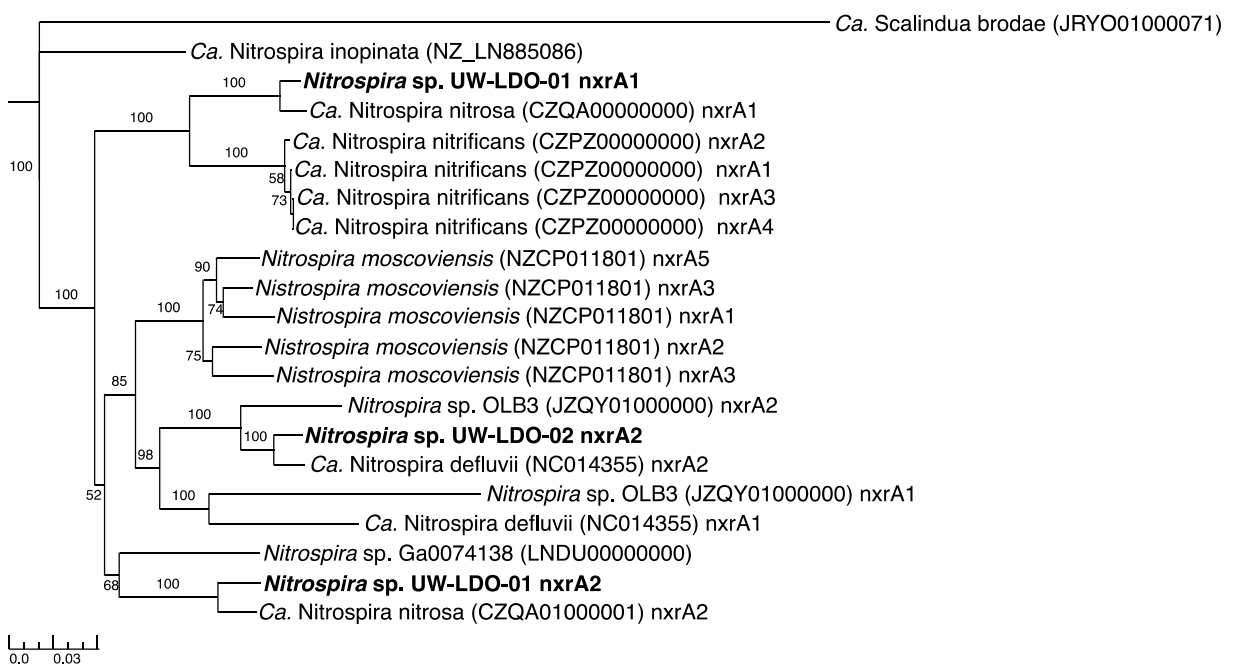

**Figure S2.** Neighbor-joining phylogenetic tree based on nucleic acid sequences of homologs to *nxr* found in the genome of *Nitrospira*-like bacteria. Bootstrap values are shown in the tree branches based on 1000 bootstrap replicates. The scale bar represents the number of nucleotide substitutions per site.
